# Supplementary material
Source: publisher figshare collection journal article supplement (https://karger.figshare.com/ndownloader/files/8711215)
Supplement: Supplementary file 1 [file 8711215]

**Online Supplementary Table 1.** Obstetric details of the study sample with test statistics

| <b>Obstetric data</b>                 |               |               |               |                      |           |
|---------------------------------------|---------------|---------------|---------------|----------------------|-----------|
| <b>Kind of loss, N (%)</b>            |               |               |               | 0.98 <sup>d</sup>    | <i>ns</i> |
| Early miscarriage                     | 118 (51.8)    | 57 (49.6)     | 61 (54.0)     |                      |           |
| Late miscarriage                      | 38 (16.7)     | 19 (16.5)     | 19 (16.8)     |                      |           |
| Termination due to fetal anomaly      | 30 (13.2)     | 15 (13.0)     | 15 (13.3)     |                      |           |
| Stillbirth                            | 42 (18.4)     | 24 (20.9)     | 18 (15.9)     |                      |           |
| <b>Mean gestational week, M (SD),</b> | 17.80 (10.09) | 18.17 (10.36) | 17.42 (9.85)  |                      |           |
| [range]                               | [5-43]        | [5-42]        | [6-43]        | 6286.50 <sup>e</sup> | <i>ns</i> |
| <b>Mean time since loss, M (SD),</b>  | 9.93 (24.11)  | 8.84 (19.28)  | 11.05 (28.23) |                      |           |
| [range]                               | [0-260]       | [0-144]       | [0-260]       | 5989.00 <sup>e</sup> | <i>ns</i> |
| <b>Previous miscarriage, N (%)</b>    | 67 (29.4)     | 33 (28.7)     | 34 (30.1)     | 0.05 <sup>b</sup>    | <i>ns</i> |
| <b>Previous termination, N (%)</b>    | 19 (8.3)      | 7 (6.1)       | 12 (10.6)     | 1.53 <sup>b</sup>    | <i>ns</i> |
| <b>Previous stillbirth, N (%)</b>     | 3 (1.3)       | 2 (1.7)       | 1 (0.9)       | 0.32 <sup>b</sup>    | <i>ns</i> |
| <b>Having living children, N (%)</b>  | 85 (37.4)     | 38 (33.0)     | 47 (41.6)     | 1.93 <sup>b</sup>    | <i>ns</i> |

*Note.* <sup>a</sup> two-tailed *t* test; <sup>b</sup> Pearson chi-square, 2 x 2 table, *df* = 1; <sup>c</sup> Pearson chi-square, 3 x 2 table, *df* = 2; <sup>d</sup> Pearson chi-square, 4 x 2 table, *df* = 3; <sup>e</sup> Mann-Whitney U-test.



Online Supplementary Table 2. Recurring themes during the intervention

| <i>Themes</i> |                                                                                   |
|---------------|-----------------------------------------------------------------------------------|
| Self-blame    | Perceiving having done something wrong (e.g. smoking or jogging during pregnancy) |
| Guilt         | Feeling that their bodies have failed                                             |
| Ambivalence   | Ambivalent attitudes toward the pregnancy                                         |
| “Child-envy”  | The feeling of being envious of other people’s children                           |
